# Supplementary material
Source: PubMed Central journal article supplement (PMC5976917)
Supplement: kwx282chengwebmaterialfinal.pdf [file kwx282chengwebmaterialfinal.pdf]

# Understanding Causal Distributional and Subgroup Effects with the Instrumental Propensity Score

Jing Cheng, Winston Lin

## Web Appendix 1

### Proof of Result 2

Result 2 holds because

$$\begin{aligned} P(Z|Y^{z,d}, D^z, s(X) = s) &= \int_x P(Z|X = x, Y^{z,d}, D^z, s(X) = s)P(X = x|Y^{z,d}, D^z, s(X) = s)dx \\ &= \int_{x:S(X)=s} P(Z|X = x, Y^{z,d}, D^z, s(X) = s)P(X = x|Y^{z,d}, D^z, s(X) = s)dx \\ &= \int_{x:S(X)=s} P(Z|X = x, Y^{z,d}, D^z)P(X = x|Y^{z,d}, D^z, S(X) = x)dx \\ &= \int_{x:S(X)=s} P(Z|X = x)P(X = x|Y^{z,d}, D^z, S(X) = s)dx \\ &= \int_{x:S(X)=s} P(Z|S(X) = s)P(X = x|Y^{z,d}, D^z, S(X) = s)dx \\ &= P(Z|s(X) = s), \end{aligned}$$

where the second equality follows from that  $P(X = x|Y^{z,d}, D^z, S(X) = s) = 0$  if  $s(x) \neq s$ .

The fourth equality holds because  $Z$  is strongly ignorable given  $X$ . The condition  $0 < P(Z = 1|S(X)) < 1$  follows from  $0 < P(Z = 1|X) < 1$ .

EL Estimation With the density ratio model, we will use the empirical likelihood methodology of Cheng, Qin and Zhang (2009) to make inferences about the potential outcome densities  $h_a^k$ ,  $h_n^k$ ,  $h_{c1}^k$  and  $h_{c0}^k$  in stratum  $k$  of the instrumental propensity score. Note that the treatment effect can be different across strata, and when  $\alpha_{c1}^k$  and  $\beta_{c1}^k$  are zero, there is no treatment effect for the compliers in stratum  $k$ . By (2) and (3), the log-likelihood for

stratum  $k$  is

$$\begin{aligned}
\ell^k &= n_{01}^k \log \phi_a^k + n_{00}^k \log(1 - \phi_a^k) + n_{10}^k \log \phi_n^k + n_{11}^k \log(1 - \phi_n^k) \\
&+ \sum_{i=1}^{n^k} [I(Z_i^k = 0, D_i^k = 1)(\alpha_3^k + \beta_3^k y_i) + I(Z_i^k = D_i^k = 0) \log\{\lambda^k + (1 - \lambda^k) \exp(\alpha_1^k + \beta_1^k y_i)\}] \\
&+ \sum_{i=1}^{n^k} [I(Z_i^k = D_i^k = 1) \log\{\tau^k \exp(\alpha_2^k + \beta_2^k y_i) + (1 - \tau^k) \exp(\alpha_3^k + \beta_3^k y_i)\}] \\
&+ \sum_{i=1}^{n^k} [I(Z_i^k = 1, D_i^k = 0)(\alpha_1^k + \beta_1^k y_i)] + \sum_{i=1}^{n^k} \log h_{c_0}^k(y_i)
\end{aligned}$$

where  $n_{zd}^k$  is the number of observations under  $z$  and  $d$ ,  $h_{c_0}^k(\cdot)$  is unspecified and  $h_{c_0}^k \in C = \{h_{c_0}^k | h_{c_0}^k(y_i) \geq 0, \sum_{i=1}^{n^k} h_{c_0}^k(y_i) = 1, \sum_{i=1}^{n^k} h_{c_0}^k(y_i) \exp(\alpha_j^k + \beta_j^k y_i) = 1, j = 1, 2, 3\}$ . The constraint on  $h_{c_0}^k$  ensures that the estimators for outcome distributions  $H_j$  are cumulative distribution functions. Maximize the log-likelihood with constraint through Lagrange multipliers  $\xi_j^k$ , we have the profiled log-likelihood in stratum  $k$ :

$$\begin{aligned}
\ell^k &\propto n_{01}^k \log \phi_a^k + n_{00}^k \log(1 - \phi_a^k) + n_{10}^k \log \phi_n^k + n_{11}^k \log(1 - \phi_n^k) \\
&+ \sum_{i=1}^{n^k} I(Z_i^k = 1, D_i^k = 0)(\alpha_n^k + \beta_n^k y_i) \\
&+ \sum_{i=1}^{n^k} I(Z_i^k = D_i^k = 1) \log\{\tau^k \exp(\alpha_{c^1}^k + \beta_{c^1}^k y_i) + (1 - \tau^k) \exp(\alpha_a^k + \beta_a^k y_i)\} \\
&+ \sum_{i=1}^{n^k} [I(Z_i^k = 0, D_i^k = 1)(\alpha_a^k + \beta_a^k y_i) + \\
&\quad I(Z_i^k = D_i^k = 0) \log\{\lambda^k + (1 - \lambda^k) \exp(\alpha_n^k + \beta_n^k y_i)\}] \\
&- \sum_{i=1}^{n^k} \log[1 + \xi_n^k \{\exp(\alpha_n^k + \beta_n^k y_i) - 1\} + \xi_{c^1}^k \{\exp(\alpha_{c^1}^k + \beta_{c^1}^k y_i) - 1\} + \\
&\quad \xi_a^k \{\exp(\alpha_a^k + \beta_a^k y_i) - 1\}],
\end{aligned}$$

Maximizing the log likelihood in stratum  $k$  we have

$$\begin{aligned}
\hat{h}_{c^0}^k(y_i) &= \frac{1}{n^k} \frac{1}{1 + \sum_j \hat{\xi}_j^k \{\exp(\hat{\alpha}_j^k + \hat{\beta}_j^k y_i) - 1\}}, \\
\hat{h}_{c^1}^k(y_i) &= \hat{h}_{c^0}^k(y_i) \exp(\hat{\alpha}_{c^1}^k + \hat{\beta}_{c^1}^k y_i), \\
\hat{H}_{c^0}^k(y) &= \sum_i \hat{h}_{c^0}^k(y_i) I(y_i \leq y) \\
\hat{H}_{c^1}^k(y) &= \sum_i \hat{h}_{c^0}^k(y_i) \exp(\hat{\alpha}_{c^1}^k + \hat{\beta}_{c^1}^k y_i) I(y_i \leq y)
\end{aligned}$$

### **Simulation**

In the simulation, we simulated data on the covariates, IV, latent compliance classes and corresponding potential outcomes, and we knew the true causal effects. Observed treatment and outcomes were also simulated based on the IV and latent compliance classes. In real data analyses, we did not know the latent compliance classes and corresponding potential

outcomes and could only use the observed treatment and outcomes for analyses, where latent compliance class was an unmeasured factor. The IV methods allow us to consistently estimate the causal effects of compliers of our interest.

I. Simulate covariates

$$X_{1i}^Z \sim N(0, 1), \quad X_{2i}^Z \sim \text{Bernoulli}(0.5), \quad X_{3i}^Z \sim \text{gamma}(2, 1)$$

II. Simulate the instrumental variable  $Z$

$$P(Z = 1 | X^Z = x) = \text{logit}^{-1}(\eta^T X) = \frac{\exp(\eta_0 + \eta_1 X_{1i}^Z + \eta_2 X_{2i}^Z + \eta_3 X_{3i}^Z)}{1 + \exp(\eta_0 + \eta_1 X_{1i}^Z + \eta_2 X_{2i}^Z + \eta_3 X_{3i}^Z)}$$

III. Simulate latent compliance class  $C$  with probabilities varying over IPS strata.

$$P(C_i = a) : 0.05 - 0.25; \quad P(C_i = n) : 0.05 - 0.25; \quad P(C_i = c) : 0.50 - 0.90$$

IV. Simulate observed treatment received  $D$  based on  $Z$  and  $C$ :

$$Z_i = 1, C_i = c : D_i = 1; \quad Z_i = 1, C_i = a : D_i = 1; \quad Z_i = 1, C_i = n : D_i = 0;$$

$$Z_i = 0, C_i = c : D_i = 0; \quad Z_i = 0, C_i = a : D_i = 1; \quad Z_i = 0, C_i = n : D_i = 0;$$

V. Simulate potential outcomes of latent compliance class over IPS strata:

Web Table 1 shows the true distributions of potential outcomes over IPS strata. Note that the density ratio model in equation (3) holds under all the distributions considered and the parameters of the density ratio models are functions of the potential outcome distributions

of latent compliance classes.

VI: Simulate observed outcome:

Within each IPS stratum, the observed outcome was generated as:

$$\begin{aligned}
Z_i = 1, D_i = 1 : \quad Y_i &= \frac{\pi_c(x)}{\pi_c(x) + \pi_a(x)} (Y_i | C_i = c, Z_i = 1) + \frac{\pi_a(x)}{\pi_c(x) + \pi_a(x)} (Y_i | C_i = a); \\
Z_i = 1, D_i = 0 : \quad Y_i &= (Y_i | C_i = n); \\
Z_i = 0, D_i = 0 : \quad Y_i &= \frac{\pi_c(x)}{\pi_c(x) + \pi_n(x)} (Y_i | C_i = c, Z_i = 1) + \frac{\pi_n(x)}{\pi_c(x) + \pi_n(x)} (Y_i | C_i = n); \\
Z_i = 0, D_i = 1 : \quad Y_i &= (Y_i | C_i = a);
\end{aligned}$$

VII: True values of estimands

- Within each IPS stratum: true values of causal effects were computed with true outcome distributions and latent compliance classes;
- Overall causal effects over strata: true values of overall causal effects over strata were computed as a weighted average of the true stratum-specific causal effects with the true values of stratum-specific causal effects and compliance class probabilities .

Web Table 2 shows that the bias and root mean squared errors of our semiparametric (SEM) estimates on parameters of interest are small under all settings. The semiparametric empirical likelihood ratio statistic  $R$  was used to test  $H_0 : h_{c^0}^k(y) = h_{c^1}^k(y)$  or equivalently  $H_0 : \alpha_{c^1}^k = \beta_{c^1}^k = 0$ , and it has a null distribution of  $\chi_1^2$  (Cheng et al. 2009). The empirical rejection rates show that the test rejects the null hypothesis around the nominal level (0.05) under the null and has good power ( $> 0.80$ ) under the alternative hypothesis. Web Table 3 shows estimates of overall and stratum-specific CACE and CQCE, where the semiparametric (SEM) estimates were more efficient than the standard IV (SIV) estimates for CQCE.

Web Table 1: True distributions of potential outcomes over IPS strata.

| Five equal-sized strata |                   | IPS stratum |         |         |         |         |
|-------------------------|-------------------|-------------|---------|---------|---------|---------|
| Dist'n                  |                   | 1st         | 2nd     | 3rd     | 4th     | 5th     |
| Normal                  | $Y_i^1 C_i = c^*$ | N(1,1)      | N(2,1)  | N(3,1)  | N(4,1)  | N(5,1)  |
|                         | $Y_i^0 C_i = c$   | N(0,1)      | N(0,1)  | N(0,1)  | N(0,1)  | N(0,1)  |
|                         | $Y_i^d C_i = a$   | N(3,1)      | N(4,1)  | N(5,1)  | N(6,1)  | N(7,1)  |
|                         | $Y_i^d C_i = n$   | N(1,1)      | N(2,1)  | N(3,1)  | N(4,1)  | N(5,1)  |
| Log Normal              | $Y_i^1 C_i = c^*$ | LN(1,1)     | LN(2,1) | LN(3,1) | LN(4,1) | LN(5,1) |
|                         | $Y_i^0 C_i = c$   | LN(0,1)     | LN(0,1) | LN(0,1) | LN(0,1) | LN(0,1) |
|                         | $Y_i^d C_i = a$   | LN(3,1)     | LN(4,1) | LN(5,1) | LN(6,1) | LN(7,1) |
|                         | $Y_i^d C_i = n$   | LN(1,1)     | LN(2,1) | LN(3,1) | LN(4,1) | LN(5,1) |
| Exponential             | $Y_i^1 C_i = c^*$ | exp(2)      | exp(3)  | exp(4)  | exp(5)  | exp(6)  |
|                         | $Y_i^0 C_i = c$   | exp(1)      | exp(1)  | exp(1)  | exp(1)  | exp(1)  |
|                         | $Y_i^d C_i = a$   | exp(4)      | exp(5)  | exp(6)  | exp(7)  | exp(8)  |
|                         | $Y_i^d C_i = n$   | exp(2)      | exp(3)  | exp(4)  | exp(5)  | exp(6)  |
| Poisson                 | $Y_i^1 C_i = c^*$ | Poi(2)      | Poi(3)  | Poi(4)  | Poi(5)  | Poi(6)  |
|                         | $Y_i^0 C_i = c$   | Poi(1)      | Poi(1)  | Poi(1)  | Poi(1)  | Poi(1)  |
|                         | $Y_i^d C_i = a$   | Poi(4)      | Poi(5)  | Poi(6)  | Poi(7)  | Poi(8)  |
|                         | $Y_i^d C_i = n$   | Poi(2)      | Poi(3)  | Poi(4)  | Poi(5)  | Poi(6)  |

  

| Four fixed range strata |                   | IPS stratum |             |             |             |
|-------------------------|-------------------|-------------|-------------|-------------|-------------|
|                         |                   | (0, 0.25]   | (0.25, 0.5] | (0.5, 0.75] | (0.75, 1.0) |
| Normal                  | $Y_i^1 C_i = c^a$ | N(1,1)      | N(2,1)      | N(3,1)      | N(4,1)      |
|                         | $Y_i^0 C_i = c$   | N(0,1)      | N(0,1)      | N(0,1)      | N(0,1)      |
|                         | $Y_i^d C_i = a$   | N(3,1)      | N(4,1)      | N(5,1)      | N(6,1)      |
|                         | $Y_i^d C_i = n$   | N(1,1)      | N(2,1)      | N(3,1)      | N(4,1)      |
| Log Normal              | $Y_i^1 C_i = c^a$ | LN(1,1)     | LN(2,1)     | LN(3,1)     | LN(4,1)     |
|                         | $Y_i^0 C_i = c$   | LN(0,1)     | LN(0,1)     | LN(0,1)     | LN(0,1)     |
|                         | $Y_i^d C_i = a$   | LN(3,1)     | LN(4,1)     | LN(5,1)     | LN(6,1)     |
|                         | $Y_i^d C_i = n$   | LN(1,1)     | LN(2,1)     | LN(3,1)     | LN(4,1)     |
| Exponential             | $Y_i^1 C_i = c^a$ | exp(2)      | exp(3)      | exp(4)      | exp(5)      |
|                         | $Y_i^0 C_i = c$   | exp(1)      | exp(1)      | exp(1)      | exp(1)      |
|                         | $Y_i^d C_i = a$   | exp(4)      | exp(5)      | exp(6)      | exp(7)      |
|                         | $Y_i^d C_i = n$   | exp(2)      | exp(3)      | exp(4)      | exp(5)      |
| Poisson                 | $Y_i^1 C_i = c^a$ | Poi(2)      | Poi(3)      | Poi(4)      | Poi(5)      |
|                         | $Y_i^0 C_i = c$   | Poi(1)      | Poi(1)      | Poi(1)      | Poi(1)      |
|                         | $Y_i^d C_i = a$   | Poi(4)      | Poi(5)      | Poi(6)      | Poi(7)      |
|                         | $Y_i^d C_i = n$   | Poi(2)      | Poi(3)      | Poi(4)      | Poi(5)      |

<sup>a</sup>In the setting of no treatment effect,  $(Y_i^1|C_i = c)$  has the same true distribution as  $(Y_i^0|C_i = c)$  over all IPS strata.

Web Table 2: Estimates of  $\alpha_{c^1}$  and  $\beta_{c^1}$  and estimated rejection rate with  $R$  under different settings

| $k$ | $\begin{Bmatrix} h_{c^0} \\ h_n \\ h_{c^1} \\ h_a \end{Bmatrix}$       | $\alpha_{c^1}$ | $\beta_{c^1}$ | $\hat{\alpha}_{c^1}$ |       |       | $\hat{\beta}_{c^1}$ |       |       | $R$       |
|-----|------------------------------------------------------------------------|----------------|---------------|----------------------|-------|-------|---------------------|-------|-------|-----------|
|     |                                                                        |                |               | ave                  | SE    | RMSE  | ave                 | SE    | RMSE  | $\hat{r}$ |
| 1   | $\begin{Bmatrix} N(0,1) \\ N(1,1) \\ N(2,1) \\ N(3,1) \end{Bmatrix}$   | -2             | 2             | -2.119               | 0.354 | 0.374 | 2.072               | 0.285 | 0.294 | 1.000     |
| 2   | $\begin{Bmatrix} N(0.5,1) \\ N(2,1) \\ N(3,1) \\ N(4,1) \end{Bmatrix}$ | -4.375         | 2.5           | -4.342               | 0.551 | 0.552 | 2.480               | 0.312 | 0.313 | 1.000     |
| 3   | $\begin{Bmatrix} N(1,1) \\ N(3,1) \\ N(4,1) \\ N(5,1) \end{Bmatrix}$   | -7.5           | 3             | -7.348               | 0.967 | 0.979 | 2.957               | 0.426 | 0.428 | 1.000     |
| 4   | $\begin{Bmatrix} N(2,1) \\ N(4,1) \\ N(5,1) \\ N(6,1) \end{Bmatrix}$   | -10.5          | 3             | -10.543              | 1.591 | 1.592 | 3.063               | 0.535 | 0.539 | 1.000     |
| 1   | $\begin{Bmatrix} N(2,1) \\ N(1,1) \\ N(2,1) \\ N(3,1) \end{Bmatrix}$   | 0              | 0             | -0.025               | 0.287 | 0.288 | 0.010               | 0.141 | 0.142 | 0.048     |
| 2   | $\begin{Bmatrix} N(3,1) \\ N(2,1) \\ N(3,1) \\ N(4,1) \end{Bmatrix}$   | 0              | 0             | -0.055               | 0.327 | 0.332 | 0.018               | 0.109 | 0.110 | 0.052     |
| 3   | $\begin{Bmatrix} N(4,1) \\ N(3,1) \\ N(4,1) \\ N(5,1) \end{Bmatrix}$   | 0              | 0             | -0.066               | 0.469 | 0.474 | 0.017               | 0.118 | 0.119 | 0.053     |
| 4   | $\begin{Bmatrix} N(5,1) \\ N(4,1) \\ N(5,1) \\ N(6,1) \end{Bmatrix}$   | 0              | 0             | -0.072               | 0.822 | 0.825 | 0.016               | 0.166 | 0.166 | 0.059     |

| $k$ | $\begin{Bmatrix} h_{c^0} \\ h_n \\ h_{c^1} \\ h_a \end{Bmatrix}$     | $\alpha_{c^1}$ |               | $\hat{\alpha}_{c^1}$ |       |       | $\hat{\beta}_{c^1}$ |       |       | $R$        |
|-----|----------------------------------------------------------------------|----------------|---------------|----------------------|-------|-------|---------------------|-------|-------|------------|
|     |                                                                      | $\alpha_{c^1}$ | $\beta_{c^1}$ | ave                  | SE    | RMSE  | ave                 | SE    | RMSE  | $\hat{r}r$ |
| 1   | $\begin{Bmatrix} Exp(1) \\ Exp(2) \\ Exp(3) \\ Exp(4) \end{Bmatrix}$ | 1.099          | -2            | 1.117                | 0.153 | 0.154 | -2.081              | 0.389 | 0.398 | 1.000      |
| 2   | $\begin{Bmatrix} Exp(2) \\ Exp(3) \\ Exp(4) \\ Exp(5) \end{Bmatrix}$ | 0.693          | -2            | 0.713                | 0.127 | 0.129 | -2.056              | 0.415 | 0.419 | 1.000      |
| 3   | $\begin{Bmatrix} Exp(3) \\ Exp(4) \\ Exp(5) \\ Exp(6) \end{Bmatrix}$ | 0.511          | -2            | 0.528                | 0.120 | 0.121 | -2.059              | 0.473 | 0.476 | 0.996      |
| 4   | $\begin{Bmatrix} Exp(4) \\ Exp(5) \\ Exp(6) \\ Exp(7) \end{Bmatrix}$ | 0.405          | -2            | 0.426                | 0.155 | 0.157 | -2.073              | 0.714 | 0.717 | 0.831      |
| 1   | $\begin{Bmatrix} Exp(3) \\ Exp(2) \\ Exp(3) \\ Exp(4) \end{Bmatrix}$ | 0              | 0             | 0.002                | 0.139 | 0.139 | -0.018              | 0.430 | 0.430 | 0.043      |
| 2   | $\begin{Bmatrix} Exp(4) \\ Exp(3) \\ Exp(4) \\ Exp(5) \end{Bmatrix}$ | 0              | 0             | 0.004                | 0.117 | 0.117 | -0.019              | 0.473 | 0.474 | 0.058      |
| 3   | $\begin{Bmatrix} Exp(5) \\ Exp(4) \\ Exp(5) \\ Exp(6) \end{Bmatrix}$ | 0              | 0             | 0.000                | 0.115 | 0.115 | 0.010               | 0.582 | 0.582 | 0.049      |
| 4   | $\begin{Bmatrix} Exp(6) \\ Exp(5) \\ Exp(6) \\ Exp(7) \end{Bmatrix}$ | 0              | 0             | -0.003               | 0.155 | 0.155 | 0.053               | 0.939 | 0.940 | 0.050      |



| $k$ | $\begin{Bmatrix} h_{c^0} \\ h_n \\ h_{c^1} \\ h_a \end{Bmatrix}$       | $\alpha_{c^1}$ |               | $\hat{\alpha}_{c^1}$ |       |       | $\hat{\beta}_{c^1}$ |       |       | $R$              |
|-----|------------------------------------------------------------------------|----------------|---------------|----------------------|-------|-------|---------------------|-------|-------|------------------|
|     |                                                                        | $\alpha_{c^1}$ | $\beta_{c^1}$ | ave                  | SE    | RMSE  | ave                 | SE    | RMSE  | $\hat{r}\hat{r}$ |
| 1   | $\begin{Bmatrix} Poi(3) \\ Poi(2) \\ Poi(5) \\ Poi(4) \end{Bmatrix}$   | -2             | 0.511         | -2.076               | 0.330 | 0.338 | 0.525               | 0.075 | 0.075 | 1.000            |
| 2   | $\begin{Bmatrix} Poi(3.5) \\ Poi(3) \\ Poi(6) \\ Poi(5) \end{Bmatrix}$ | -2.5           | 0.539         | -2.560               | 0.309 | 0.315 | 0.552               | 0.065 | 0.066 | 1.000            |
| 3   | $\begin{Bmatrix} Poi(4) \\ Poi(4) \\ Poi(7) \\ Poi(6) \end{Bmatrix}$   | -3             | 0.560         | -3.038               | 0.329 | 0.332 | 0.568               | 0.063 | 0.064 | 1.000            |
| 4   | $\begin{Bmatrix} Poi(5) \\ Poi(5) \\ Poi(8) \\ Poi(7) \end{Bmatrix}$   | -3             | 0.470         | -3.093               | 0.447 | 0.456 | 0.489               | 0.077 | 0.079 | 1.000            |
| 1   | $\begin{Bmatrix} Poi(5) \\ Poi(2) \\ Poi(5) \\ Poi(4) \end{Bmatrix}$   | 0              | 0             | -0.013               | 0.305 | 0.305 | 0.002               | 0.060 | 0.060 | 0.049            |
| 2   | $\begin{Bmatrix} Poi(6) \\ Poi(3) \\ Poi(6) \\ Poi(5) \end{Bmatrix}$   | 0              | 0             | -0.039               | 0.269 | 0.271 | 0.006               | 0.045 | 0.045 | 0.052            |
| 3   | $\begin{Bmatrix} Poi(7) \\ Poi(4) \\ Poi(7) \\ Poi(6) \end{Bmatrix}$   | 0              | 0             | -0.025               | 0.298 | 0.299 | 0.004               | 0.043 | 0.043 | 0.052            |
| 4   | $\begin{Bmatrix} Poi(8) \\ Poi(5) \\ Poi(8) \\ Poi(7) \end{Bmatrix}$   | 0              | 0             | -0.021               | 0.434 | 0.434 | 0.003               | 0.055 | 0.055 | 0.054            |

ave: averaged estimate over the Monte Carlo replications; SE: standard error of the estimate; RMSE: root mean squared error;  $\hat{r}\hat{r}$ : estimated rejection rate;  $k$ : IPS stratum.

Web Table 3: Standard IV and semiparametric estimates for CACE based on instrumental propensity score

| $k$     | $\begin{Bmatrix} h_0 \\ h_1 \\ h_2 \\ h_3 \end{Bmatrix}$                   | CACE  | $\widehat{CACE}^{SIV}$ |       |       | $\widehat{CACE}^{SEM}$ |       |       |
|---------|----------------------------------------------------------------------------|-------|------------------------|-------|-------|------------------------|-------|-------|
|         |                                                                            |       | ave                    | SD    | RMSE  | ave                    | SD    | RMSE  |
| Overall |                                                                            | 2.654 | 2.635                  | 0.073 | 0.075 | 2.629                  | 0.068 | 0.072 |
| 1       | $\begin{Bmatrix} N(0, 1) \\ N(1, 1) \\ N(2, 1) \\ N(3, 1) \end{Bmatrix}$   | 2.0   | 2.031                  | 0.141 | 0.145 | 2.024                  | 0.139 | 0.141 |
| 2       | $\begin{Bmatrix} N(0.5, 1) \\ N(2, 1) \\ N(3, 1) \\ N(4, 1) \end{Bmatrix}$ | 2.5   | 2.520                  | 0.119 | 0.121 | 2.517                  | 0.114 | 0.115 |
| 3       | $\begin{Bmatrix} N(1, 1) \\ N(3, 1) \\ N(4, 1) \\ N(5, 1) \end{Bmatrix}$   | 3.0   | 3.003                  | 0.132 | 0.132 | 2.999                  | 0.121 | 0.121 |
| 4       | $\begin{Bmatrix} N(2, 1) \\ N(4, 1) \\ N(5, 1) \\ N(6, 1) \end{Bmatrix}$   | 3.0   | 3.029                  | 0.186 | 0.188 | 3.020                  | 0.167 | 0.168 |
| Overall |                                                                            | 0     | 0.022                  | 0.069 | 0.072 | 0.020                  | 0.067 | 0.070 |
| 1       | $\begin{Bmatrix} N(2, 1) \\ N(1, 1) \\ N(2, 1) \\ N(3, 1) \end{Bmatrix}$   | 0     | 0.015                  | 0.144 | 0.145 | 0.013                  | 0.142 | 0.143 |
| 2       | $\begin{Bmatrix} N(3, 1) \\ N(2, 1) \\ N(3, 1) \\ N(4, 1) \end{Bmatrix}$   | 0     | 0.023                  | 0.116 | 0.118 | 0.021                  | 0.114 | 0.116 |
| 3       | $\begin{Bmatrix} N(4, 1) \\ N(3, 1) \\ N(4, 1) \\ N(5, 1) \end{Bmatrix}$   | 0     | 0.025                  | 0.123 | 0.126 | 0.021                  | 0.122 | 0.124 |
| 4       | $\begin{Bmatrix} N(5, 1) \\ N(4, 1) \\ N(5, 1) \\ N(6, 1) \end{Bmatrix}$   | 0     | 0.023                  | 0.168 | 0.169 | 0.021                  | 0.165 | 0.166 |

| $k$     | $\begin{Bmatrix} h_0 \\ h_1 \\ h_2 \\ h_3 \end{Bmatrix}$             | CACE   | $\widehat{CACE}^{SIV}$ |       |       | $\widehat{CACE}^{SEM}$ |       |       |
|---------|----------------------------------------------------------------------|--------|------------------------|-------|-------|------------------------|-------|-------|
|         |                                                                      |        | ave                    | SD    | RMSE  | ave                    | SD    | RMSE  |
| Overall |                                                                      | -0.26  | -0.291                 | 0.024 | 0.039 | -0.291                 | 0.024 | 0.040 |
| 1       | $\begin{Bmatrix} Exp(1) \\ Exp(2) \\ Exp(3) \\ Exp(4) \end{Bmatrix}$ | -0.667 | -0.658                 | 0.067 | 0.067 | -0.658                 | 0.067 | 0.068 |
| 2       | $\begin{Bmatrix} Exp(2) \\ Exp(3) \\ Exp(4) \\ Exp(5) \end{Bmatrix}$ | -0.250 | -0.261                 | 0.042 | 0.043 | -0.261                 | 0.042 | 0.043 |
| 3       | $\begin{Bmatrix} Exp(3) \\ Exp(4) \\ Exp(5) \\ Exp(6) \end{Bmatrix}$ | -0.133 | -0.137                 | 0.031 | 0.031 | -0.137                 | 0.031 | 0.031 |
| 4       | $\begin{Bmatrix} Exp(4) \\ Exp(5) \\ Exp(6) \\ Exp(7) \end{Bmatrix}$ | -0.083 | -0.086                 | 0.034 | 0.034 | -0.086                 | 0.034 | 0.034 |
| Overall |                                                                      | 0      | 0.000                  | 0.016 | 0.016 | -0.001                 | 0.016 | 0.016 |
| 1       | $\begin{Bmatrix} Exp(3) \\ Exp(2) \\ Exp(3) \\ Exp(4) \end{Bmatrix}$ | 0      | 0.000                  | 0.045 | 0.045 | 0.000                  | 0.044 | 0.044 |
| 2       | $\begin{Bmatrix} Exp(4) \\ Exp(3) \\ Exp(4) \\ Exp(5) \end{Bmatrix}$ | 0      | -0.001                 | 0.028 | 0.028 | -0.001                 | 0.028 | 0.028 |
| 3       | $\begin{Bmatrix} Exp(5) \\ Exp(4) \\ Exp(5) \\ Exp(6) \end{Bmatrix}$ | 0      | 0.000                  | 0.023 | 0.023 | -0.001                 | 0.025 | 0.025 |
| 4       | $\begin{Bmatrix} Exp(6) \\ Exp(5) \\ Exp(6) \\ Exp(7) \end{Bmatrix}$ | 0      | 0.000                  | 0.025 | 0.025 | -0.001                 | 0.025 | 0.025 |

| $k$     | $\begin{Bmatrix} h_0 \\ h_1 \\ h_2 \\ h_3 \end{Bmatrix}$               | CACE  | $\widehat{CACE}^{SIV}$ |       |       | $\widehat{CACE}^{SEM}$ |       |       |
|---------|------------------------------------------------------------------------|-------|------------------------|-------|-------|------------------------|-------|-------|
|         |                                                                        |       | ave                    | SD    | RMSE  | ave                    | SD    | RMSE  |
| Overall |                                                                        | 2.654 | 2.641                  | 0.142 | 0.143 | 2.641                  | 0.143 | 0.143 |
| 1       | $\begin{Bmatrix} Poi(3) \\ Poi(2) \\ Poi(5) \\ Poi(4) \end{Bmatrix}$   | 2.0   | 2.036                  | 0.277 | 0.279 | 2.035                  | 0.278 | 0.280 |
| 2       | $\begin{Bmatrix} Poi(3.5) \\ Poi(3) \\ Poi(6) \\ Poi(5) \end{Bmatrix}$ | 2.5   | 2.539                  | 0.242 | 0.245 | 2.538                  | 0.241 | 0.244 |
| 3       | $\begin{Bmatrix} Poi(4) \\ Poi(4) \\ Poi(7) \\ Poi(6) \end{Bmatrix}$   | 3.0   | 3.006                  | 0.249 | 0.249 | 3.007                  | 0.250 | 0.250 |
| 4       | $\begin{Bmatrix} Poi(5) \\ Poi(5) \\ Poi(8) \\ Poi(7) \end{Bmatrix}$   | 3.0   | 3.025                  | 0.356 | 0.357 | 3.025                  | 0.356 | 0.357 |
| Overall |                                                                        | 0     | 0.028                  | 0.166 | 0.168 | 0.026                  | 0.164 | 0.166 |
| 1       | $\begin{Bmatrix} Poi(5) \\ Poi(2) \\ Poi(5) \\ Poi(4) \end{Bmatrix}$   | 0     | 0.019                  | 0.302 | 0.303 | 0.016                  | 0.297 | 0.297 |
| 2       | $\begin{Bmatrix} Poi(6) \\ Poi(3) \\ Poi(6) \\ Poi(5) \end{Bmatrix}$   | 0     | 0.043                  | 0.274 | 0.277 | 0.040                  | 0.268 | 0.271 |
| 3       | $\begin{Bmatrix} Poi(7) \\ Poi(4) \\ Poi(7) \\ Poi(6) \end{Bmatrix}$   | 0     | 0.024                  | 0.300 | 0.301 | 0.026                  | 0.293 | 0.294 |
| 4       | $\begin{Bmatrix} Poi(8) \\ Poi(5) \\ Poi(8) \\ Poi(7) \end{Bmatrix}$   | 0     | 0.021                  | 0.431 | 0.431 | 0.019                  | 0.425 | 0.426 |

Web Table 4: Standard IV and semiparametric estimates for CQCE based on instrumental propensity score

| $k$     | $\begin{Bmatrix} h_0 \\ h_1 \\ h_2 \\ h_3 \end{Bmatrix}$               | CQCE                                                              | $\widehat{CQCE}^{SIV}$ |       |       | $\widehat{CQCE}^{SEM}$ |       |       |
|---------|------------------------------------------------------------------------|-------------------------------------------------------------------|------------------------|-------|-------|------------------------|-------|-------|
|         |                                                                        | $\begin{Bmatrix} 0.1 \\ 0.25 \\ 0.5 \\ 0.75 \\ 0.9 \end{Bmatrix}$ | ave                    | SD    | RMSE  | ave                    | SD    | RMSE  |
| Overall |                                                                        | 2.335                                                             | 2.244                  | 0.127 | 0.156 | 2.250                  | 0.114 | 0.142 |
|         |                                                                        | 2.485                                                             | 2.406                  | 0.100 | 0.128 | 2.402                  | 0.093 | 0.124 |
|         |                                                                        | 2.676                                                             | 2.658                  | 0.087 | 0.089 | 2.653                  | 0.079 | 0.083 |
|         |                                                                        | 2.841                                                             | 2.879                  | 0.107 | 0.114 | 2.873                  | 0.099 | 0.104 |
|         |                                                                        | 2.938                                                             | 2.977                  | 0.161 | 0.166 | 2.967                  | 0.141 | 0.144 |
| 1       | $\begin{Bmatrix} N(0,1) \\ N(1,1) \\ N(2,1) \\ N(3,1) \end{Bmatrix}$   | 2.0                                                               | 2.010                  | 0.210 | 0.210 | 2.025                  | 0.180 | 0.182 |
|         |                                                                        | 2.0                                                               | 2.007                  | 0.176 | 0.176 | 2.015                  | 0.153 | 0.154 |
|         |                                                                        | 2.0                                                               | 2.023                  | 0.168 | 0.169 | 2.020                  | 0.154 | 0.156 |
|         |                                                                        | 2.0                                                               | 2.038                  | 0.187 | 0.190 | 2.026                  | 0.168 | 0.170 |
|         |                                                                        | 2.0                                                               | 2.056                  | 0.262 | 0.268 | 2.034                  | 0.206 | 0.209 |
| 2       | $\begin{Bmatrix} N(0.5,1) \\ N(2,1) \\ N(3,1) \\ N(4,1) \end{Bmatrix}$ | 2.5                                                               | 2.488                  | 0.170 | 0.170 | 2.495                  | 0.156 | 0.156 |
|         |                                                                        | 2.5                                                               | 2.509                  | 0.137 | 0.137 | 2.507                  | 0.128 | 0.129 |
|         |                                                                        | 2.5                                                               | 2.519                  | 0.136 | 0.137 | 2.518                  | 0.129 | 0.130 |
|         |                                                                        | 2.5                                                               | 2.534                  | 0.166 | 0.169 | 2.529                  | 0.151 | 0.153 |
|         |                                                                        | 2.5                                                               | 2.537                  | 0.224 | 0.227 | 2.533                  | 0.186 | 0.189 |
| 3       | $\begin{Bmatrix} N(1,1) \\ N(3,1) \\ N(4,1) \\ N(5,1) \end{Bmatrix}$   | 3.0                                                               | 2.975                  | 0.182 | 0.184 | 2.981                  | 0.177 | 0.178 |
|         |                                                                        | 3.0                                                               | 2.990                  | 0.142 | 0.143 | 2.992                  | 0.138 | 0.139 |
|         |                                                                        | 3.0                                                               | 3.002                  | 0.139 | 0.139 | 3.003                  | 0.134 | 0.134 |
|         |                                                                        | 3.0                                                               | 3.013                  | 0.169 | 0.170 | 3.008                  | 0.161 | 0.161 |
|         |                                                                        | 3.0                                                               | 3.017                  | 0.251 | 0.252 | 3.018                  | 0.203 | 0.204 |
| 4       | $\begin{Bmatrix} N(2,1) \\ N(4,1) \\ N(5,1) \\ N(6,1) \end{Bmatrix}$   | 3.0                                                               | 3.031                  | 0.241 | 0.243 | 3.032                  | 0.234 | 0.237 |
|         |                                                                        | 3.0                                                               | 3.027                  | 0.194 | 0.196 | 3.026                  | 0.190 | 0.192 |
|         |                                                                        | 3.0                                                               | 3.019                  | 0.190 | 0.191 | 3.019                  | 0.183 | 0.184 |
|         |                                                                        | 3.0                                                               | 3.017                  | 0.231 | 0.231 | 3.016                  | 0.210 | 0.211 |
|         |                                                                        | 3.0                                                               | 3.011                  | 0.351 | 0.351 | 3.019                  | 0.269 | 0.270 |

| $k$     | $\begin{Bmatrix} h_0 \\ h_1 \\ h_2 \\ h_3 \end{Bmatrix}$                 | CQCE<br>$\begin{Bmatrix} 0.1 \\ 0.25 \\ 0.5 \\ 0.75 \\ 0.9 \end{Bmatrix}$ | $\widehat{CQCE}^{SIV}$ |       |       | $\widehat{CQCE}^{SEM}$ |       |       |
|---------|--------------------------------------------------------------------------|---------------------------------------------------------------------------|------------------------|-------|-------|------------------------|-------|-------|
|         |                                                                          |                                                                           | ave                    | SD    | RMSE  | ave                    | SD    | RMSE  |
| Overall |                                                                          | 0                                                                         | 0.017                  | 0.138 | 0.139 | 0.016                  | 0.104 | 0.106 |
|         |                                                                          | 0                                                                         | 0.022                  | 0.105 | 0.108 | 0.017                  | 0.081 | 0.083 |
|         |                                                                          | 0                                                                         | 0.022                  | 0.094 | 0.097 | 0.022                  | 0.068 | 0.071 |
|         |                                                                          | 0                                                                         | 0.024                  | 0.111 | 0.114 | 0.020                  | 0.088 | 0.090 |
|         |                                                                          | 0                                                                         | 0.021                  | 0.149 | 0.150 | 0.019                  | 0.116 | 0.118 |
| 1       | $\begin{Bmatrix} N(2, 1) \\ N(1, 1) \\ N(2, 1) \\ N(3, 1) \end{Bmatrix}$ | 0                                                                         | 0.018                  | 0.235 | 0.235 | 0.015                  | 0.144 | 0.145 |
|         |                                                                          | 0                                                                         | 0.008                  | 0.185 | 0.185 | 0.012                  | 0.144 | 0.144 |
|         |                                                                          | 0                                                                         | 0.014                  | 0.168 | 0.169 | 0.013                  | 0.145 | 0.146 |
|         |                                                                          | 0                                                                         | 0.018                  | 0.179 | 0.180 | 0.013                  | 0.147 | 0.147 |
|         |                                                                          | 0                                                                         | 0.020                  | 0.242 | 0.243 | 0.010                  | 0.148 | 0.148 |
| 2       | $\begin{Bmatrix} N(3, 1) \\ N(2, 1) \\ N(3, 1) \\ N(4, 1) \end{Bmatrix}$ | 0                                                                         | 0.027                  | 0.200 | 0.202 | 0.022                  | 0.119 | 0.121 |
|         |                                                                          | 0                                                                         | 0.029                  | 0.149 | 0.152 | 0.022                  | 0.159 | 0.166 |
|         |                                                                          | 0                                                                         | 0.023                  | 0.138 | 0.140 | 0.021                  | 0.115 | 0.117 |
|         |                                                                          | 0                                                                         | 0.022                  | 0.156 | 0.158 | 0.021                  | 0.119 | 0.121 |
|         |                                                                          | 0                                                                         | 0.012                  | 0.201 | 0.202 | 0.021                  | 0.117 | 0.119 |
| 3       | $\begin{Bmatrix} N(4, 1) \\ N(3, 1) \\ N(4, 1) \\ N(5, 1) \end{Bmatrix}$ | 0                                                                         | 0.035                  | 0.216 | 0.154 | 0.020                  | 0.130 | 0.132 |
|         |                                                                          | 0                                                                         | 0.022                  | 0.216 | 0.219 | 0.020                  | 0.125 | 0.127 |
|         |                                                                          | 0                                                                         | 0.020                  | 0.143 | 0.145 | 0.020                  | 0.122 | 0.124 |
|         |                                                                          | 0                                                                         | 0.024                  | 0.158 | 0.160 | 0.022                  | 0.124 | 0.126 |
|         |                                                                          | 0                                                                         | 0.030                  | 0.210 | 0.212 | 0.021                  | 0.126 | 0.127 |
| 4       | $\begin{Bmatrix} N(5, 1) \\ N(4, 1) \\ N(5, 1) \\ N(6, 1) \end{Bmatrix}$ | 0                                                                         | 0.059                  | 0.282 | 0.288 | 0.019                  | 0.174 | 0.175 |
|         |                                                                          | 0                                                                         | 0.037                  | 0.213 | 0.216 | 0.019                  | 0.169 | 0.170 |
|         |                                                                          | 0                                                                         | 0.026                  | 0.190 | 0.192 | 0.021                  | 0.168 | 0.169 |
|         |                                                                          | 0                                                                         | 0.020                  | 0.208 | 0.208 | 0.022                  | 0.162 | 0.163 |
|         |                                                                          | 0                                                                         | 0.009                  | 0.275 | 0.275 | 0.022                  | 0.165 | 0.167 |

| $k$     | $\begin{Bmatrix} h_0 \\ h_1 \\ h_2 \\ h_3 \end{Bmatrix}$             | CQCE<br>$\begin{Bmatrix} 0.1 \\ 0.25 \\ 0.5 \\ 0.75 \\ 0.9 \end{Bmatrix}$ | $\widehat{CQCE}^{SIV}$ |       |       | $\widehat{CQCE}^{SEM}$ |       |       |
|---------|----------------------------------------------------------------------|---------------------------------------------------------------------------|------------------------|-------|-------|------------------------|-------|-------|
|         |                                                                      |                                                                           | ave                    | SD    | RMSE  | ave                    | SD    | RMSE  |
| Overall |                                                                      | -0.019                                                                    | -0.020                 | 0.008 | 0.008 | -0.020                 | 0.004 | 0.004 |
|         |                                                                      | -0.054                                                                    | -0.055                 | 0.013 | 0.013 | -0.057                 | 0.009 | 0.009 |
|         |                                                                      | -0.138                                                                    | -0.147                 | 0.023 | 0.025 | -0.149                 | 0.020 | 0.022 |
|         |                                                                      | -0.312                                                                    | -0.344                 | 0.040 | 0.051 | -0.345                 | 0.036 | 0.049 |
|         |                                                                      | -0.620                                                                    | -0.714                 | 0.075 | 0.121 | -0.714                 | 0.069 | 0.116 |
| 1       | $\begin{Bmatrix} Exp(1) \\ Exp(2) \\ Exp(3) \\ Exp(4) \end{Bmatrix}$ | -0.070                                                                    | -0.068                 | 0.026 | 0.026 | -0.072                 | 0.016 | 0.016 |
|         |                                                                      | -0.192                                                                    | -0.187                 | 0.043 | 0.043 | -0.193                 | 0.033 | 0.033 |
|         |                                                                      | -0.462                                                                    | -0.451                 | 0.072 | 0.073 | -0.457                 | 0.063 | 0.063 |
|         |                                                                      | -0.924                                                                    | -0.908                 | 0.116 | 0.118 | -0.907                 | 0.108 | 0.110 |
|         |                                                                      | -1.535                                                                    | -1.523                 | 0.202 | 0.202 | -1.518                 | 0.189 | 0.189 |
| 2       | $\begin{Bmatrix} Exp(2) \\ Exp(3) \\ Exp(4) \\ Exp(5) \end{Bmatrix}$ | -0.026                                                                    | -0.027                 | 0.014 | 0.014 | -0.028                 | 0.007 | 0.007 |
|         |                                                                      | -0.072                                                                    | -0.073                 | 0.025 | 0.025 | -0.075                 | 0.017 | 0.017 |
|         |                                                                      | -0.173                                                                    | -0.176                 | 0.041 | 0.041 | -0.178                 | 0.035 | 0.035 |
|         |                                                                      | -0.347                                                                    | -0.357                 | 0.070 | 0.071 | -0.357                 | 0.065 | 0.066 |
|         |                                                                      | -0.576                                                                    | -0.604                 | 0.122 | 0.125 | -0.601                 | 0.113 | 0.115 |
| 3       | $\begin{Bmatrix} Exp(3) \\ Exp(4) \\ Exp(5) \\ Exp(6) \end{Bmatrix}$ | -0.014                                                                    | -0.015                 | 0.011 | 0.011 | -0.015                 | 0.005 | 0.005 |
|         |                                                                      | -0.038                                                                    | -0.040                 | 0.019 | 0.019 | -0.040                 | 0.011 | 0.011 |
|         |                                                                      | -0.092                                                                    | -0.095                 | 0.032 | 0.032 | -0.097                 | 0.026 | 0.026 |
|         |                                                                      | -0.185                                                                    | -0.189                 | 0.055 | 0.055 | -0.190                 | 0.049 | 0.050 |
|         |                                                                      | -0.307                                                                    | -0.314                 | 0.092 | 0.092 | -0.316                 | 0.083 | 0.084 |
| 4       | $\begin{Bmatrix} Exp(4) \\ Exp(5) \\ Exp(6) \\ Exp(7) \end{Bmatrix}$ | -0.009                                                                    | -0.011                 | 0.012 | 0.012 | -0.010                 | 0.005 | 0.005 |
|         |                                                                      | -0.024                                                                    | -0.025                 | 0.020 | 0.020 | -0.026                 | 0.011 | 0.012 |
|         |                                                                      | -0.058                                                                    | -0.060                 | 0.035 | 0.035 | -0.062                 | 0.026 | 0.027 |
|         |                                                                      | -0.116                                                                    | -0.120                 | 0.058 | 0.058 | -0.122                 | 0.050 | 0.051 |
|         |                                                                      | -0.192                                                                    | -0.197                 | 0.101 | 0.101 | -0.197                 | 0.083 | 0.083 |

| $k$     | $\begin{Bmatrix} h_0 \\ h_1 \\ h_2 \\ h_3 \end{Bmatrix}$             | CQCE<br>$\begin{Bmatrix} 0.1 \\ 0.25 \\ 0.5 \\ 0.75 \\ 0.9 \end{Bmatrix}$ | $\widehat{CQCE}^{SIV}$ |       |       | $\widehat{CQCE}^{SEM}$ |       |       |
|---------|----------------------------------------------------------------------|---------------------------------------------------------------------------|------------------------|-------|-------|------------------------|-------|-------|
|         |                                                                      |                                                                           | ave                    | SD    | RMSE  | ave                    | SD    | RMSE  |
| Overall |                                                                      | 0                                                                         | 0.000                  | 0.005 | 0.005 | 0.000                  | 0.002 | 0.002 |
|         |                                                                      | 0                                                                         | 0.000                  | 0.008 | 0.008 | 0.000                  | 0.005 | 0.005 |
|         |                                                                      | 0                                                                         | 0.000                  | 0.015 | 0.015 | 0.000                  | 0.011 | 0.011 |
|         |                                                                      | 0                                                                         | 0.000                  | 0.026 | 0.025 | -0.001                 | 0.021 | 0.021 |
|         |                                                                      | 0                                                                         | 0.000                  | 0.047 | 0.047 | -0.002                 | 0.038 | 0.039 |
| 1       | $\begin{Bmatrix} Exp(3) \\ Exp(2) \\ Exp(3) \\ Exp(4) \end{Bmatrix}$ | 0                                                                         | 0.001                  | 0.015 | 0.015 | 0.000                  | 0.005 | 0.005 |
|         |                                                                      | 0                                                                         | 0.001                  | 0.024 | 0.024 | 0.000                  | 0.014 | 0.014 |
|         |                                                                      | 0                                                                         | 0.001                  | 0.044 | 0.044 | 0.000                  | 0.032 | 0.032 |
|         |                                                                      | 0                                                                         | 0.000                  | 0.072 | 0.072 | 0.000                  | 0.062 | 0.062 |
|         |                                                                      | 0                                                                         | -0.004                 | 0.133 | 0.133 | -0.001                 | 0.104 | 0.104 |
| 2       | $\begin{Bmatrix} Exp(4) \\ Exp(3) \\ Exp(4) \\ Exp(5) \end{Bmatrix}$ | 0                                                                         | 0.000                  | 0.009 | 0.009 | 0.000                  | 0.003 | 0.003 |
|         |                                                                      | 0                                                                         | 0.000                  | 0.016 | 0.016 | 0.000                  | 0.009 | 0.009 |
|         |                                                                      | 0                                                                         | 0.000                  | 0.028 | 0.028 | -0.001                 | 0.021 | 0.021 |
|         |                                                                      | 0                                                                         | -0.002                 | 0.047 | 0.047 | -0.001                 | 0.040 | 0.040 |
|         |                                                                      | 0                                                                         | -0.003                 | 0.086 | 0.086 | -0.003                 | 0.067 | 0.067 |
| 3       | $\begin{Bmatrix} Exp(5) \\ Exp(4) \\ Exp(5) \\ Exp(6) \end{Bmatrix}$ | 0                                                                         | 0.000                  | 0.008 | 0.008 | 0.000                  | 0.003 | 0.003 |
|         |                                                                      | 0                                                                         | -0.001                 | 0.013 | 0.013 | 0.000                  | 0.007 | 0.007 |
|         |                                                                      | 0                                                                         | 0.000                  | 0.022 | 0.022 | 0.000                  | 0.016 | 0.016 |
|         |                                                                      | 0                                                                         | 0.000                  | 0.039 | 0.039 | -0.001                 | 0.032 | 0.032 |
|         |                                                                      | 0                                                                         | 0.001                  | 0.067 | 0.067 | 0.000                  | 0.054 | 0.054 |
| 4       | $\begin{Bmatrix} Exp(6) \\ Exp(5) \\ Exp(6) \\ Exp(7) \end{Bmatrix}$ | 0                                                                         | -0.001                 | 0.008 | 0.008 | 0.000                  | 0.003 | 0.003 |
|         |                                                                      | 0                                                                         | 0.000                  | 0.014 | 0.014 | 0.000                  | 0.008 | 0.008 |
|         |                                                                      | 0                                                                         | -0.001                 | 0.025 | 0.025 | 0.000                  | 0.018 | 0.018 |
|         |                                                                      | 0                                                                         | -0.001                 | 0.043 | 0.043 | -0.001                 | 0.035 | 0.035 |
|         |                                                                      | 0                                                                         | -0.001                 | 0.075 | 0.075 | -0.002                 | 0.059 | 0.059 |



| $k$     | $\begin{Bmatrix} h_0 \\ h_1 \\ h_2 \\ h_3 \end{Bmatrix}$               | CQCE<br>$\begin{Bmatrix} 0.1 \\ 0.25 \\ 0.5 \\ 0.75 \\ 0.9 \end{Bmatrix}$ | $\widehat{CQCE}^{SIV}$ |       |       | $\widehat{CQCE}^{SEM}$ |       |       |
|---------|------------------------------------------------------------------------|---------------------------------------------------------------------------|------------------------|-------|-------|------------------------|-------|-------|
|         |                                                                        |                                                                           | ave                    | SD    | RMSE  | ave                    | SD    | RMSE  |
| Overall |                                                                        | 2                                                                         | 1.941                  | 0.303 | 0.308 | 1.958                  | 0.201 | 0.205 |
|         |                                                                        | 3                                                                         | 2.530                  | 0.523 | 0.773 | 2.676                  | 0.515 | 0.735 |
|         |                                                                        | 2                                                                         | 2.160                  | 0.378 | 0.410 | 2.111                  | 0.321 | 0.339 |
|         |                                                                        | 3                                                                         | 3.038                  | 0.216 | 0.219 | 3.025                  | 0.162 | 0.164 |
|         |                                                                        | 3                                                                         | 3.358                  | 0.525 | 0.636 | 3.314                  | 0.477 | 0.571 |
| 1       | $\begin{Bmatrix} Poi(3) \\ Poi(2) \\ Poi(5) \\ Poi(4) \end{Bmatrix}$   | 1                                                                         | 1.296                  | 0.470 | 0.555 | 1.227                  | 0.419 | 0.477 |
|         |                                                                        | 1                                                                         | 1.272                  | 0.534 | 0.713 | 1.245                  | 0.509 | 0.676 |
|         |                                                                        | 2                                                                         | 1.914                  | 0.370 | 0.380 | 1.947                  | 0.290 | 0.295 |
|         |                                                                        | 2                                                                         | 2.424                  | 0.526 | 0.675 | 2.418                  | 0.502 | 0.653 |
|         |                                                                        | 3                                                                         | 2.833                  | 0.690 | 0.710 | 2.856                  | 0.637 | 0.653 |
| 2       | $\begin{Bmatrix} Poi(3.5) \\ Poi(3) \\ Poi(6) \\ Poi(5) \end{Bmatrix}$ | 2                                                                         | 1.957                  | 0.411 | 0.414 | 1.968                  | 0.212 | 0.215 |
|         |                                                                        | 2                                                                         | 2.185                  | 0.418 | 0.457 | 2.166                  | 0.383 | 0.417 |
|         |                                                                        | 3                                                                         | 2.775                  | 0.457 | 0.509 | 2.823                  | 0.424 | 0.460 |
|         |                                                                        | 3                                                                         | 2.835                  | 0.644 | 0.664 | 2.828                  | 0.650 | 0.673 |
|         |                                                                        | 3                                                                         | 3.291                  | 0.509 | 0.586 | 3.265                  | 0.474 | 0.543 |
| 3       | $\begin{Bmatrix} Poi(4) \\ Poi(4) \\ Poi(7) \\ Poi(6) \end{Bmatrix}$   | 2                                                                         | 2.167                  | 0.638 | 0.660 | 2.212                  | 0.558 | 0.597 |
|         |                                                                        | 2                                                                         | 2.427                  | 0.547 | 0.694 | 2.408                  | 0.521 | 0.662 |
|         |                                                                        | 3                                                                         | 2.991                  | 0.365 | 0.365 | 2.983                  | 0.311 | 0.312 |
|         |                                                                        | 4                                                                         | 3.608                  | 0.552 | 0.677 | 3.654                  | 0.520 | 0.625 |
|         |                                                                        | 3                                                                         | 3.799                  | 0.708 | 1.067 | 3.790                  | 0.699 | 1.055 |
| 4       | $\begin{Bmatrix} Poi(5) \\ Poi(5) \\ Poi(8) \\ Poi(7) \end{Bmatrix}$   | 3                                                                         | 2.223                  | 0.703 | 1.048 | 2.300                  | 0.636 | 0.946 |
|         |                                                                        | 3                                                                         | 2.646                  | 0.561 | 0.664 | 2.681                  | 0.501 | 0.594 |
|         |                                                                        | 3                                                                         | 3.063                  | 0.572 | 0.576 | 3.084                  | 0.497 | 0.504 |
|         |                                                                        | 4                                                                         | 3.515                  | 0.640 | 0.803 | 3.570                  | 0.601 | 0.739 |
|         |                                                                        | 4                                                                         | 3.821                  | 0.792 | 0.812 | 3.847                  | 0.691 | 0.708 |

| $k$     | $\begin{Bmatrix} h_0 \\ h_1 \\ h_2 \\ h_3 \end{Bmatrix}$             | CQCE<br>$\begin{Bmatrix} 0.1 \\ 0.25 \\ 0.5 \\ 0.75 \\ 0.9 \end{Bmatrix}$ | $\widehat{CQCE}^{SIV}$ |       |       | $\widehat{CQCE}^{SEM}$ |       |       |
|---------|----------------------------------------------------------------------|---------------------------------------------------------------------------|------------------------|-------|-------|------------------------|-------|-------|
|         |                                                                      |                                                                           | ave                    | SD    | RMSE  | ave                    | SD    | RMSE  |
| Overall |                                                                      | 0                                                                         | 0.014                  | 0.161 | 0.161 | 0.002                  | 0.045 | 0.045 |
|         |                                                                      | 0                                                                         | 0.059                  | 0.699 | 0.701 | 0.075                  | 0.643 | 0.648 |
|         |                                                                      | 0                                                                         | -0.006                 | 0.253 | 0.253 | 0.002                  | 0.184 | 0.184 |
|         |                                                                      | 0                                                                         | -0.010                 | 0.303 | 0.303 | -0.015                 | 0.216 | 0.217 |
|         |                                                                      | 0                                                                         | -0.047                 | 0.391 | 0.394 | -0.043                 | 0.267 | 0.270 |
| 1       | $\begin{Bmatrix} Poi(5) \\ Poi(2) \\ Poi(5) \\ Poi(4) \end{Bmatrix}$ | 0                                                                         | 0.078                  | 0.626 | 0.631 | 0.032                  | 0.462 | 0.463 |
|         |                                                                      | 0                                                                         | 0.086                  | 0.685 | 0.690 | 0.055                  | 0.615 | 0.618 |
|         |                                                                      | 0                                                                         | -0.071                 | 0.385 | 0.391 | -0.049                 | 0.301 | 0.305 |
|         |                                                                      | 0                                                                         | 0.072                  | 0.714 | 0.717 | 0.068                  | 0.666 | 0.670 |
|         |                                                                      | 0                                                                         | 0.015                  | 0.627 | 0.627 | 0.011                  | 0.439 | 0.440 |
| 2       | $\begin{Bmatrix} Poi(6) \\ Poi(3) \\ Poi(6) \\ Poi(5) \end{Bmatrix}$ | 0                                                                         | 0.063                  | 0.453 | 0.457 | -0.001                 | 0.192 | 0.192 |
|         |                                                                      | 0                                                                         | 0.061                  | 0.529 | 0.532 | 0.037                  | 0.431 | 0.433 |
|         |                                                                      | 0                                                                         | 0.002                  | 0.405 | 0.405 | 0.011                  | 0.324 | 0.324 |
|         |                                                                      | 0                                                                         | 0.047                  | 0.711 | 0.712 | 0.076                  | 0.655 | 0.659 |
|         |                                                                      | 0                                                                         | 0.083                  | 0.599 | 0.604 | 0.077                  | 0.501 | 0.507 |
| 3       | $\begin{Bmatrix} Poi(7) \\ Poi(4) \\ Poi(7) \\ Poi(6) \end{Bmatrix}$ | 0                                                                         | 0.069                  | 0.633 | 0.637 | 0.060                  | 0.425 | 0.429 |
|         |                                                                      | 0                                                                         | -0.013                 | 0.439 | 0.440 | 0.002                  | 0.286 | 0.286 |
|         |                                                                      | 0                                                                         | 0.046                  | 0.436 | 0.438 | 0.055                  | 0.363 | 0.368 |
|         |                                                                      | 0                                                                         | 0.087                  | 0.643 | 0.649 | 0.077                  | 0.591 | 0.596 |
|         |                                                                      | 0                                                                         | 0.037                  | 0.758 | 0.759 | 0.034                  | 0.633 | 0.634 |
| 4       | $\begin{Bmatrix} Poi(8) \\ Poi(5) \\ Poi(8) \\ Poi(7) \end{Bmatrix}$ | 0                                                                         | -0.018                 | 0.844 | 0.844 | -0.012                 | 0.620 | 0.620 |
|         |                                                                      | 0                                                                         | 0.021                  | 0.614 | 0.614 | 0.026                  | 0.419 | 0.420 |
|         |                                                                      | 0                                                                         | 0.090                  | 0.645 | 0.651 | 0.110                  | 0.555 | 0.566 |
|         |                                                                      | 0                                                                         | 0.111                  | 0.715 | 0.724 | 0.121                  | 0.615 | 0.627 |
|         |                                                                      | 0                                                                         | 0.058                  | 0.884 | 0.886 | 0.084                  | 0.702 | 0.707 |
